# Supplementary material for: Electron transport properties in dye-sensitized solar cells with {001} facet-dominant TiO2 nanoparticles
Source: Royal Society of Chemistry journal article supplement (doi:10.1039/c7cp03593d), 2017-01-01
Supplement: c7cp03593d1.pdf [file c7cp03593d1.pdf]

## **Electron Transport Properties in Dye-sensitized Solar Cells with {001} Facet-Dominant TiO<sub>2</sub> Nanoparticles**

Masato M. Maitani<sup>1†\*</sup>, Keita Tanaka<sup>1</sup>, Qing Shen<sup>2</sup>, Taro Toyoda<sup>2</sup>, Yuji Wada<sup>1\*</sup>

<sup>1</sup> School of Materials and Chemical Technology, Tokyo Institute of Technology, 2-12-1 Ookayama, Meguro, Tokyo 152-8552, Japan

<sup>2</sup> Department of Engineering Science, University of Electro-Communications, 1-5-1 Chofugaoka, Chofu, Tokyo 182-8585, Japan

## S1 Experimental Details

### S1-1. Preparation of TiO<sub>2</sub>

#### *S1-1-1 Hydrothermal synthesis of anatase TiO<sub>2</sub>*

TiO<sub>2</sub> nanoparticles were synthesized under microwave hydrothermal reaction with previously reported procedure<sup>1-4</sup>. The synthesis procedure consists of the precursor solution composed of tetrabutoxytitanium(IV) (Ti(OBu)<sub>4</sub>, 25 mL) and aqueous hydrofluoric acid solution (HF, 6 mL, 23 wt%) NS. The mixed precursor solutions were then tightened in a Teflon-lined autoclave container and kept at 200 °C for 35min in a microwave oven (Milestone General, Japan). The white powdery precipitates were washed with ethanol and distilled water several times by a sonication followed by a decantation. The defluorination was carried out by washing samples with aqueous NaOH solution (0.1M) through a decantation a few times in order to remove the fluorinated titanium products on TiO<sub>2</sub> surface<sup>1-4</sup>. Although NP does not contain the fluoride compound, same procedure of washing with NaOH solution was applied for avoiding the unknown effects of NaOH washing on the characteristics. And then, the particles were washed by 0.1M hydrochloric acid aqueous solution a few times, and re-dispersed in the ethanol after decantation with deionized (DI) water reached above pH 7. The ethanoilic suspensions of NP and NS TiO<sub>2</sub> were processed to prepare TiO<sub>2</sub> paste.

#### *S1-1-2 Preparation of anatase TiO<sub>2</sub> Paste*

Earned TiO<sub>2</sub> nanoparticle suspensions in ethanol were then processed to prepare a TiO<sub>2</sub> paste for creating mesoporous TiO<sub>2</sub> films by adding binders of  $\alpha$ -terpineol and ethylcellulose dispersed in ethanol. The mixed suspensions composed of TiO<sub>2</sub> (2.73 wt%), ethanol (84.8 wt%),  $\alpha$ -terpineol (11.1 wt%), ethylcellulose (18-22mPa, 0.77 wt%) and ethylcellulose (45-55mPa, 0.60 wt%) were homogenized under ultrasound sonic-hone (titanium) followed by ball milling with zirconia beads for 20h.<sup>5</sup> Finally the ethanolic solvent was evaporated by rotary evaporator under 45 °C to earn the 8~10wt% of TiO<sub>2</sub> as the paste. Both of mesoporous TiO<sub>2</sub> films revealed no trace amount of fluoride-related contaminant in XPS analysis (S2-2).<sup>1-4</sup>

### S1-2 DSSC preparation

A photoanode of DSSC was fabricated using TiO<sub>2</sub> paste of NS and NP on fluorine doped tin oxide (FTO) transparent conducting oxide glass (TCO22-7, Solaronix) by employing the doctor blade technique. Photocurrent-voltage characteristics of DSSC were measured with the device configuration composed of the mesoporous TiO<sub>2</sub> layer (~10 $\mu$ m) and opaque TiO<sub>2</sub> scattering layer (~5 $\mu$ m). Whereas, transparent cell configuration composed of thin TiO<sub>2</sub> films (~4 $\mu$ m) without scattering layer were applied for the analyses of electron transport dynamics by transient absorption spectroscopy and transient photocurrent-voltage including charge extraction method. Therefore on the first mesoporous TiO<sub>2</sub> layer coated on FTO substrates dried at 125°C on a hot plate, the second TiO<sub>2</sub> scattering layer was subsequently deposited by the same doctor blade technique with using commercially available paste (Ti-nanoxide D/SP, Solaronix). The TiO<sub>2</sub> films were then baked at 500 °C for 30 min. TiO<sub>2</sub> films were then dipped into a 0.5 mM Ru dye (N719, Solaronix) in *tert*-butanol (TBOH) and acetonitrile (AN) mixed solution (volume ratio of 1:1) for 16 h at room temperature. After the dye adsorption, these dye-sensitized TiO<sub>2</sub> films were then rinsed three times with ethanol to remove physi-sorbed dyes on the substrate, and then dried under nitrogen stream. A Pt-coated FTO glass as the counter electrode was prepared by spin-coating of H<sub>2</sub>PtCl<sub>6</sub>

aqueous solution (0.02M) on FTO and subsequently annealing at 400 °C for 30min in an oven. A 60 μm-thick sealant film (Meltonix 1170-60, Solaronix) was used as the spacer and sealant of dye-sensitized TiO<sub>2</sub> films and Pt counter electrodes. Finally the fabrication of the DSSCs was completed by injecting an electrolyte solution consisting of typically LiI (500 mM), iodine (50 mM), 4-*t*-butylpyridine (580 mM) and ethyl-methyl-imidazolium dicyanoimide (600 mM) in AN and valeronitrile (volume ratio of 85:15), while the varied contents of electrolyte were indicated in the main section. The cell area was typically 0.16 cm<sup>2</sup> and was precisely determined by measuring each sides of each device by a calliper.

### S1-3 Device Characterization of DSSC

Photovoltaic properties of the fabricated DSSCs was measured by using a solar simulator (Yamashita Densho YSS-50A) equipped with a Xenon lamp for light exposure and a source-meter (Keithley, model 2400). The power of solar simulator were calibrated to 100 mW/cm<sup>2</sup> as AM 1.5 using a standardized silicon solar cells (PEC-SI01, Peccell Technologies, Inc.) before the measurement of each cells. The current-voltage characteristics were measured under the simulated solar irradiation to evaluate the photovoltaic parameters such as short-circuit current density ( $J_{SC}$ ), open circuit voltage ( $V_{OC}$ ), and the fill factor ( $FF$ ) in order to estimate the conversion efficiency ( $\eta$ ) as the relationship of;

$$\eta(\%) = J_{sc}(\text{mA}/\text{cm}^2) \times V_{oc}(\text{V}) \times FF \quad (\text{S1-1})$$

Spectral response as a function of the wavelength also known as the photocurrent action spectrum of the DSSCs, was measured with a constant photon flux at each wavelength in the DC mode. A photocurrent action spectrum measurement system (CEP-2000, Bunko Keiki) was used. Upon the illumination of the constant flux of monochromatic light, the generated photocurrent  $J_{SC}$  (mA/cm<sup>2</sup>) was used to calculate the incident photon-current conversion efficiency (IPCE). The monochromatic photon flux density was monitored by Si photodiode. IPCE was calculated by the following equation.  $\text{IPCE} = N_e/N_p$  where  $N_e$  and  $N_p$  stand for exposure light dose and photocurrent respectively

### S1-4 Electrochemical and Photo-electrochemical Characterization of TiO<sub>2</sub> films

Photo-electrochemical measurement of TiO<sub>2</sub> films with NS and NP TiO<sub>2</sub> were performed in a 0.1M LiClO<sub>4</sub> in acetonitrile supporting electrolyte solution in a three component electrochemical cell configured with platinum wire counter electrode and Ag/Ag<sup>+</sup> reference electrode. The reference electrode was calibrated by independently measured redox potential of ferrocene (0.01M) with supporting electrolyte of 0.1M LiClO<sub>4</sub> in acetonitrile solution before and after the sample measurements. The cyclicvoltammetry of N719/TiO<sub>2</sub> was performed under scan rate of potential sweep of 50mV/sec. The optical absorption measurement under applied potential of TiO<sub>2</sub> films was also taken place with similar setup with 0.2M NaClO<sub>4</sub> aqueous supporting electrolyte solution and a reference electrode (Ag/AgCl), and which was introduced into the measurement cavity of UV-vis absorption spectrometer (V-570-DS, JASCO Inc.). The extra care was taken for the UV-vis absorption measurement under applied potential, so that none of electrochemical component, counter and reference electrodes did not interrupt the optical path for the optical measurements.

## S1-5 Transient Photoelectrochemical Measurements

Similar solar cell device configurations were used to determine the electron transport dynamics based on the transient properties of device under the photoexcitation based on the stopped light incident measurement of photo current and voltage (SLIM-PCV) reported by Nakade *et al.*<sup>6</sup> The sample was configured with the electronic system with response time of  $<150\mu\text{sec}$  for monitoring the transient change of either  $J_{SC}$  or  $V_{OC}$  by a digital multimeter under a synchronized monochromatic light source as an expanded light of the solid state laser diode (642nm, Cube, Coherent Japan) controlled by an analog voltage signals supplied from a function generator (NF1974, NF) as reported elsewhere.<sup>6</sup> The obtained transient curve was fitted to single exponential decay, therefore the time constant,  $\tau_n$  and  $\tau_c$ , of  $V_{oc}$  decay and inversed half lifetime of  $J_{SC}$ , respectively, under slight change (within  $\sim 5\%$ ) of incident laser intensity. These time constants of  $\tau_n$  and  $\tau_c$  were calculated to the lifetime of electron carrier in  $\text{TiO}_2$  mesoporous films recombining with mainly the oxidized iodide in the electrolyte solution, and transport diffusion coefficients,  $D_n$ , of electron in  $\text{TiO}_2$ , respectively, as indicated with equation S1-2. The observed sets of  $\tau_n$  and  $D_n$  under varied incident laser intensity were correlated with the carrier density in  $\text{TiO}_2$  mesoporous films, which was independently determined by a series of charge extraction analysis as previously reported<sup>7,8</sup>. DSSC cell was configured with a solid state switch opening and closing the circuit, which is controlled by a signal generator synchronizing the timing of switching with the signal control of incident light. In this setup, the extracted charges from the DSSC system, especially the electrons in  $\text{TiO}_2$  mesoporous films, are counted under working condition of either open-circuit or short-circuit as the carrier density. Consequently the carrier lifetime,  $\tau_n$ , and diffusion constant,  $D_n$ , in  $\text{TiO}_2$  were plotted as a function of the carrier density in mesoporous  $\text{TiO}_2$  films.  $\text{TiO}_2$  thin films with the thickness of  $4\mu\text{m}$  without scattering layer were applied to approximate the equal distribution of carrier generation through the  $\text{TiO}_2$  films<sup>6</sup>. The charge density was determined based on the assumption of the uniform distribution of the charge throughout  $\text{TiO}_2$  films by applying the equation (S1-3) with cell area,  $A$ , film thickness,  $t$ , and porosity,  $p$ , of mesoporous  $\text{TiO}_2$  films.

$$D_n(\text{cm}^2\text{sec}^{-1}) = \frac{L^2(\text{cm}^2)}{2.77 \times \tau_c(\text{sec})} \quad (\text{S1-2})$$

$$N_n(\text{cm}^{-3}) = \frac{N_{obs}}{A(\text{cm}^2) \times t(\text{cm}) \times (1-p)} \quad (\text{S1-3})$$

## S1-6 Femtosecond Transient Absorption Spectroscopy (TAS)

In the TAS setup, the laser source was a titanium/sapphire laser (CPA-2010, Clark-MXR Inc.) with a wavelength of 775 nm, a repetition rate of 1 kHz, and a pulse width of 150 fs. The light was separated into two parts. One part was used as a probe pulse. The other part was used to pump an optical parametric amplifier (OPA) (a TOAPS from Quantronix) to generate light pulses with a wavelength tunable from 290 nm to  $3\mu\text{m}$ . It was used as a pump light to excite the sample. In this study, a pump light wavelength of 532 nm and a probe beam wavelength of 775 nm were used with the circular exposed area with diameter of 3mm and 2mm, respectively. The pump light was modulated by using a chopper with a frequency of 140 Hz. The transient absorption change of the probe beam through the sample induced by the pump light

was detected by using a silicon diode detector (Model 2031, Newport) and a lock-in-amplifier. The pump and probe light intensity were 5  $\mu\text{J}/\text{pulse}$  and 2 $\mu\text{J}/\text{pulse}$ , respectively<sup>9</sup>.

#### S1-7 $\text{TiCl}_4$ Treatment

To improve the DSSC properties,  $\text{TiCl}_4$  treatment was carried out only with the sample to achieve the best efficiency as indicated in the main section. An aqueous solution of  $\text{TiCl}_4$  (0.04M) was prepared with commercially available  $\text{TiCl}_4$  in  $\text{HCl}_{aq}$ . Solution (0.09M in  $\text{HCl}_{aq}$ , Aldrich) by dilution with DI water. Then annealed  $\text{TiO}_2$  films on FTO in a oven were immersed in the  $\text{TiCl}_4$  solution at 70°C for 30min. After the treatment, the sample films were washed by DI water and ethanol followed by drying under  $\text{N}_2$  stream. After  $\text{TiCl}_4$  treatment,  $\text{TiO}_2$  films were annealed in an electric oven at 500°C for 30 min, and then cooled samples were immersed in the dye-sensitizer solutions with exactly same procedure for device preparations as described above in S1-2.

## S2. Characterizations of TiO<sub>2</sub> Nanoparticles and Mesoporous Films

### S2-1 Characterizations of Mesoporous TiO<sub>2</sub> Films

Transmittance spectra of each mesoporous TiO<sub>2</sub> films (thickness of ~4 $\mu$ m) were obtained in the UV-vis region, 200-800nm, by a UV-vis spectrometer (V-570-DS, JASCO Inc.) with transmission mode. The transmittance of each films revealed almost identical in the UV-vis region. Therefore this indicates that the optical scattering characteristics of each films were identical. The powder x-ray diffraction (MiniFlex, Rigaku, Japan) was measured with the annealed TiO<sub>2</sub> mesoporous films revealing the expected diffraction peaks, which all are attributed to anatase TiO<sub>2</sub> with all of samples.

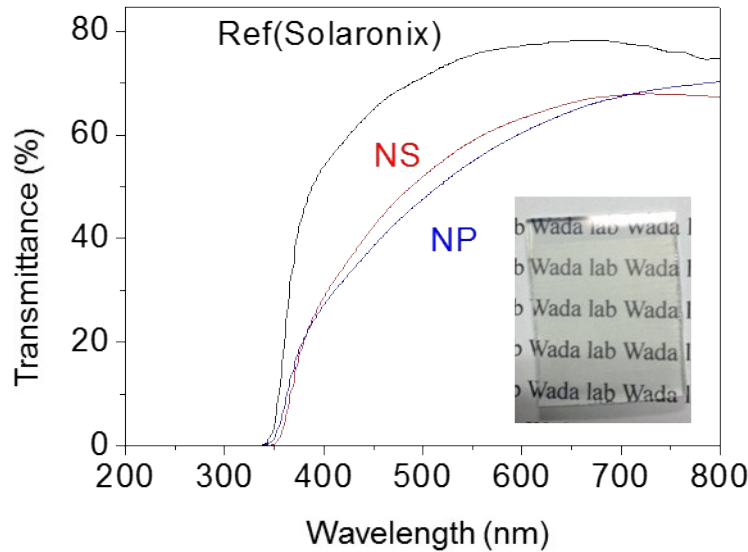

**Figure S2-1** Transmittance spectra of TiO<sub>2</sub> films (~4 $\mu$ m thick) prepared either with {001}-dominant NS (red) or {101}-dominant NP (blue) TiO<sub>2</sub> nanoparticles coated on glass substrate indicating identical transmittance characteristics. The commercially available TiO<sub>2</sub> paste (~4 $\mu$ m thick, Ti-nanoxide T/SP, Solaronix) is also indicated as a reference.

(a) SEM image of TiO<sub>2</sub> nanoparticles

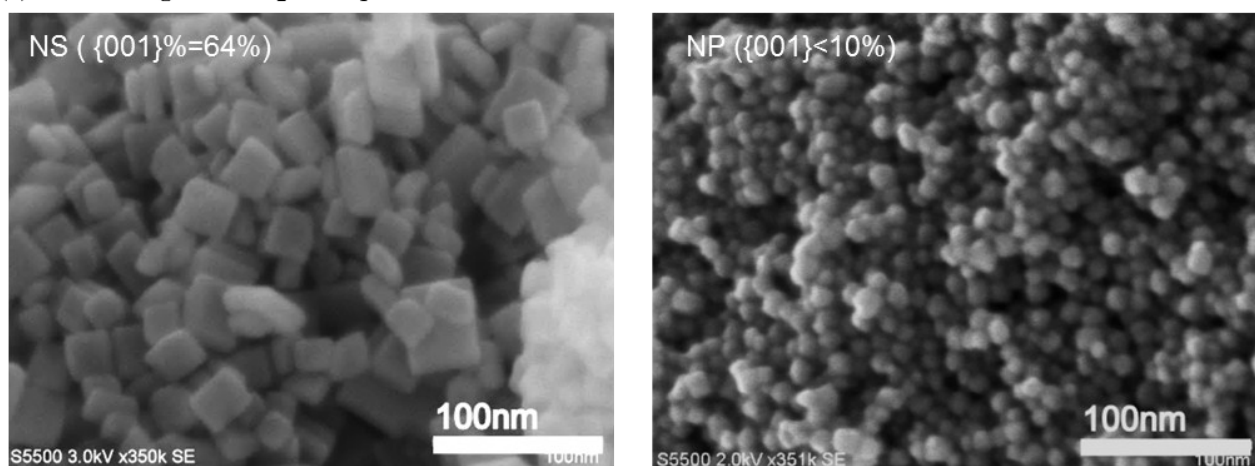

(b) XRD of TiO<sub>2</sub> nanoparticles

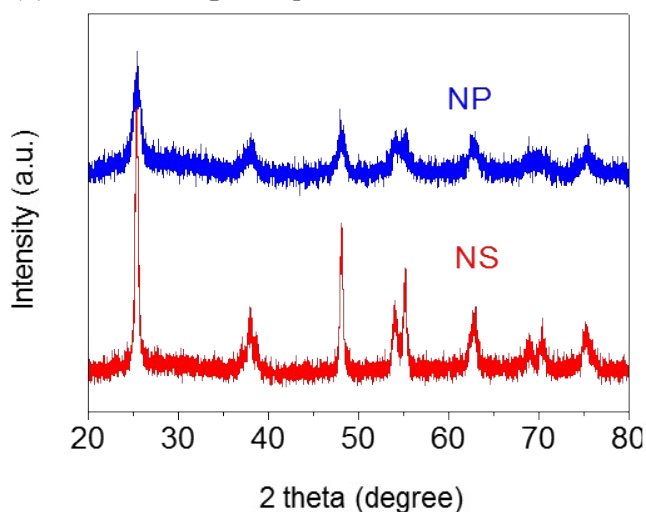

(c) XPS of TiO<sub>2</sub> nanoparticles

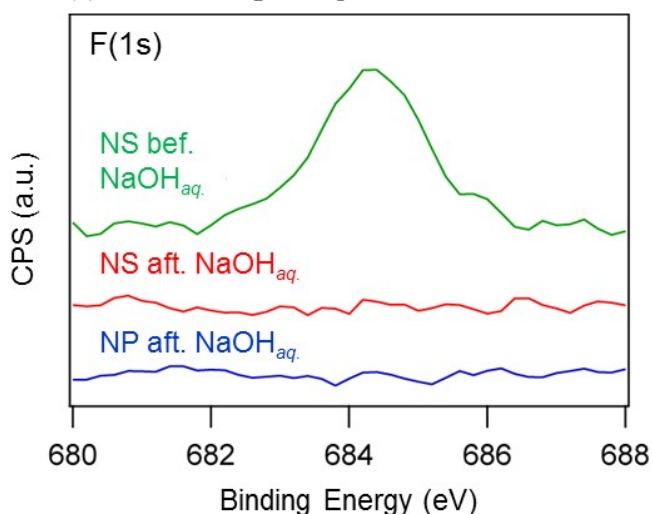

**Figure S2-2** (a) SEM images and (b) XRD of each as-synthesized NS and NP TiO<sub>2</sub> nanoparticles. The fraction of {001} of NS was calculated by the averaged diameter in *a* and *c* axis of decahedral anatase TiO<sub>2</sub> crystals in SEM images. (c) XPS in fluorine (1s) region indicates that NS and NP has no residual fluorine contamination, which could be induced by the HF in the particle synthesis as observed with NS before NaOH<sub>aq.</sub> decantation.

## S2-2 Characterizations of Anatase TiO<sub>2</sub> Nanoparticles

Based on the ideal decahedral anatase TiO<sub>2</sub> crystal indicated in Figure S2-3, we determined the geometric values of synthesized TiO<sub>2</sub> nanoparticles from mean diameter in *a* and *c* axis measured in SEM images (Figure S2-2) as summarized in Figure S2-3. According to the assumption of inter-plane angle between (101) and (001) faces to be  $\theta=68.3$  degree<sup>1-3</sup>, we calculated values of *d* and *L* geometrically and summed surface areas of {001} and {101} facets,  $S_{(001)}$  and  $S_{(101)}$ , respectively<sup>4</sup>. The fraction of {001} facets were determined from  $S_{(001)}/(S_{(001)}+S_{(101)})$ .

$$d = \frac{c/2}{\sin(68.3^\circ)} \quad (\text{S2-1})$$

$$L = a - \frac{2 \times (c/2) \times \cos(68.3^\circ)}{\sin(68.3^\circ)} \quad (\text{S2-2})$$

$$S_{(001)} = 2 \times L \times L \quad (\text{S2-3})$$

$$S_{(101)} = 8 \times (a + L) \times d / 2 \quad (\text{S2-4})$$

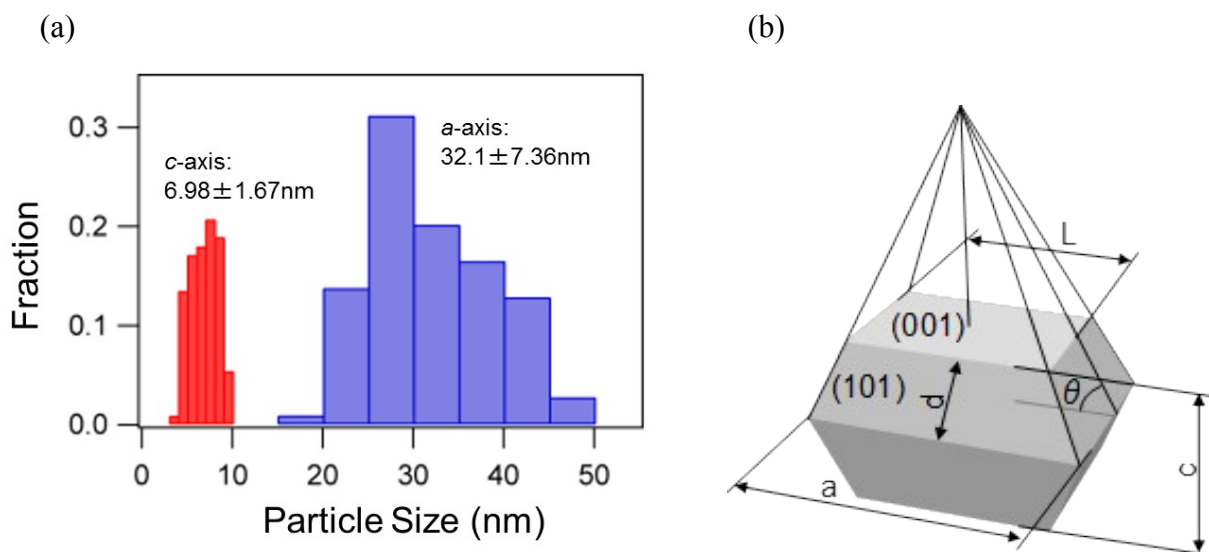

**Figure S2-3** (a) The distribution of TiO<sub>2</sub> nanoparticle diameters in *a* and *c*-axis observed in SEM were exhibited for NS TiO<sub>2</sub> nanoparticles by analyzing more than one hundred of nanoparticles. The fraction of {001} of NS was calculated by the averaged diameter in *a* and *c*-axis of decahedral anatase TiO<sub>2</sub> crystals as the modeled ideal anatase TiO<sub>2</sub> nanoparticle structure (b).<sup>1-3</sup>



### S3 DSSC Properties

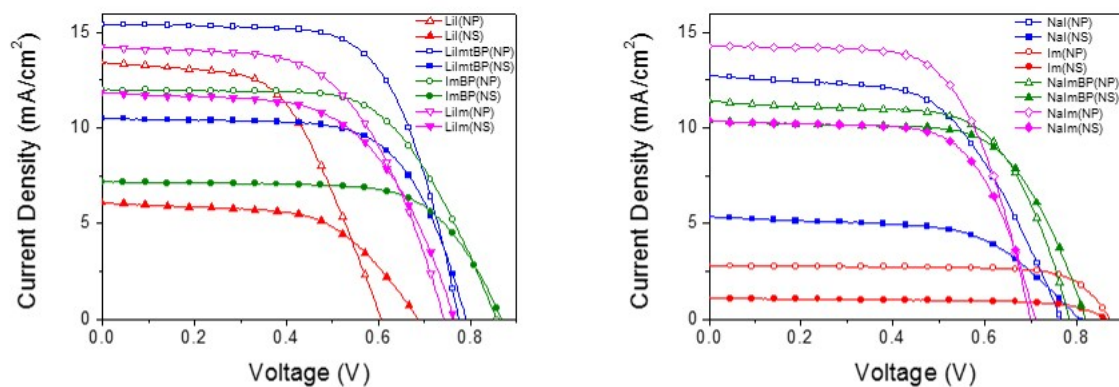

**Fig S3-1**  $J$ - $V$  characteristics of DSSCs with electrolyte of LiI, NaI, Im, ImBP, LiIm, LiImtBP, NaIm, and NaImtBP and TiO<sub>2</sub> film of NS (filled) and NP (opened) as the representative curves chosen from multiple samples. TiO<sub>2</sub> films ( $\sim 10\mu\text{m}$ ) with scattering layer ( $\sim 5\mu\text{m}$ ) are prepared to be identical for both NS and NP achieving complete light harvesting.

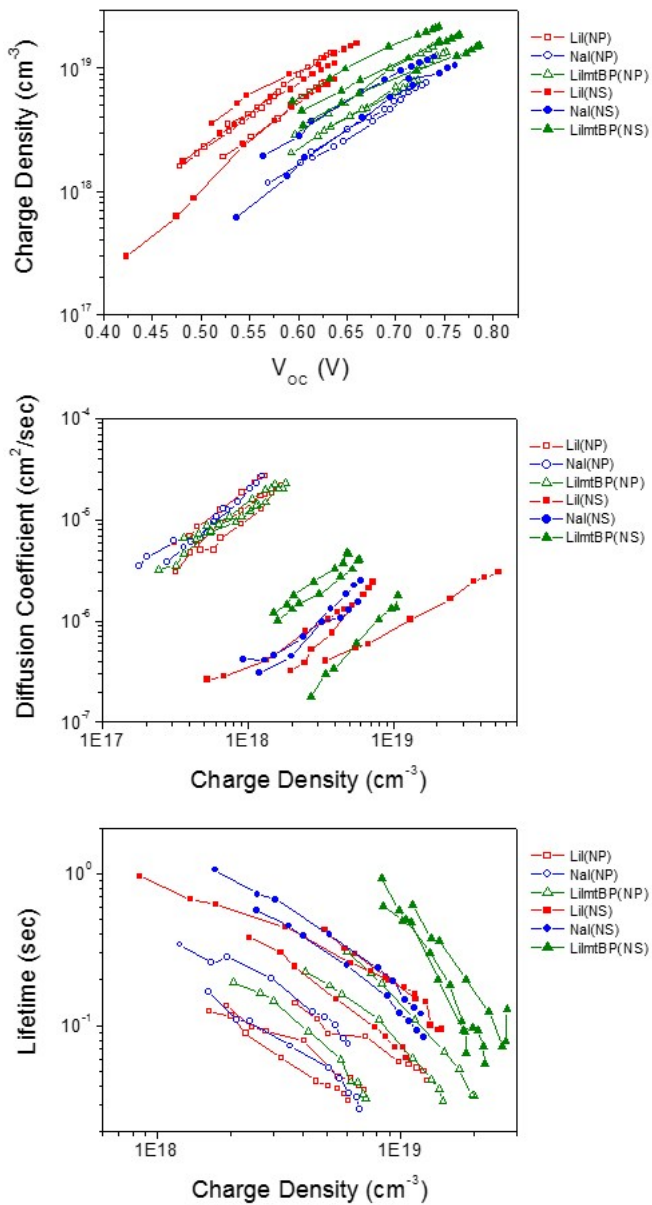

**Fig S3-2** The device-to-device deviations of (a) charge density indicating the density of trap states below CB of  $\text{TiO}_2$  as the function of open-circuit voltage determined by the charge extraction method, (b) electron diffusion coefficient, and (c) lifetime of electron in  $\text{TiO}_2$  determined by SLIM-PCV of DSSCs with electrolyte of LiI (red), NaI (blue), and LiImtBP (green) and  $\text{TiO}_2$  film of NS (filled) and NP (opened).

#### S4. Diffusion Length of Electron in TiO<sub>2</sub> Mesoporous Films in DSSC Configurations

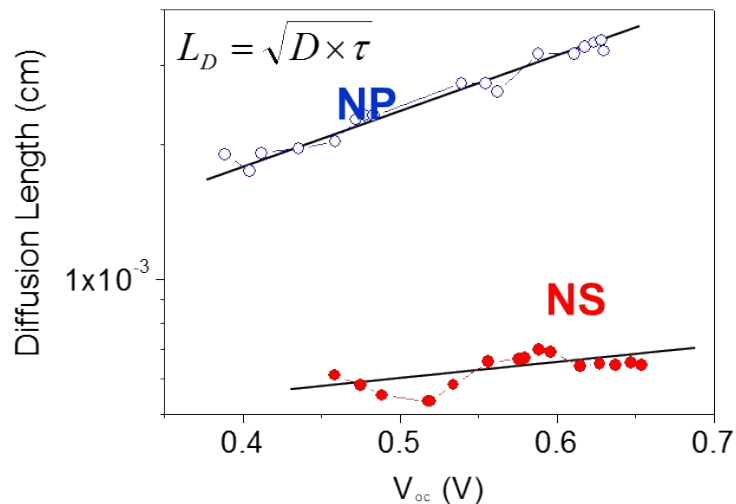

**Figure S4-1** Diffusion length of each NS (red) and NP (blue) facet-dominant TiO<sub>2</sub> films calculated from diffusion coefficient and lifetime of electron in DSSC with LiI electrolyte. The curves of each diffusion coefficient and lifetime in Figure 3 was extrapolated with exponential fitting to provide the diffusion length,  $L_D = \sqrt{D\tau}$ , as the function of the open-circuit voltage.

## S5. HOMO/LUMO Characterization of Dye-sensitizer on TiO<sub>2</sub> Mesoporous Films

(a)

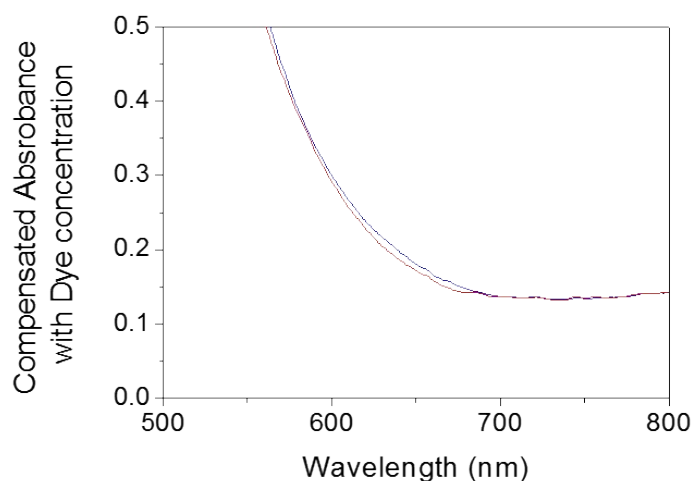

(b)

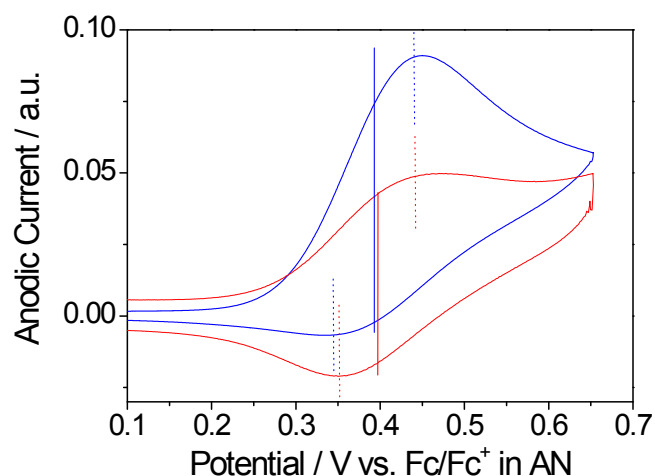

**Figure S5** (a) Optical absorbance of N719/TiO<sub>2</sub> films with NS (red) and NP (blue) TiO<sub>2</sub> obtained by the transmission UV-vis absorption spectroscopy in closed DSSC device configuration with LiI electrolyte and glass plate instead of counter electrode. The absorbance data were normalized by the adsorbed amount of dye-sensitizer for compensating the difference of the adsorbed dye amount on NS and NP TiO<sub>2</sub>. (b) Electrochemical cyclic voltammetry of N719/TiO<sub>2</sub> films with NS (red) and NP (blue) TiO<sub>2</sub> obtained in 0.1M LiClO<sub>4</sub> in acetonitrile solution in a three component electrochemical cell configured with platinum wire counter electrode and Ag/Ag<sup>+</sup> reference electrode, which was pre-calibrated by independently measured redox potential of ferrocene (0.01M) with supporting electrolyte of 0.1M LiClO<sub>4</sub> in acetonitrile solution.

## S6. TAS Results of Dye-sensitizer on TiO<sub>2</sub> Mesoporous Films in DSSC Configurations

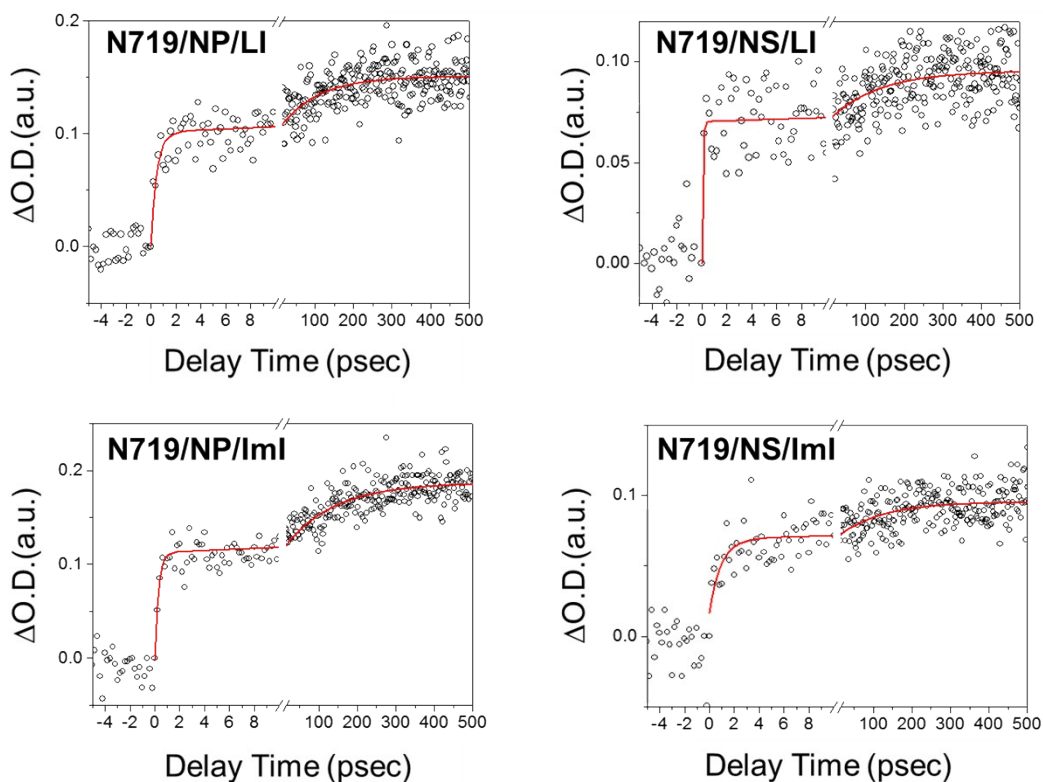

**Figure S6-1** Transient absorption rise of oxidized N719 probed at 775nm on each NS and NP TiO<sub>2</sub> films (~4 $\mu$ m thick) in DSSC closed cell configuration under short-circuit condition.

(a) Visible region (short-term)

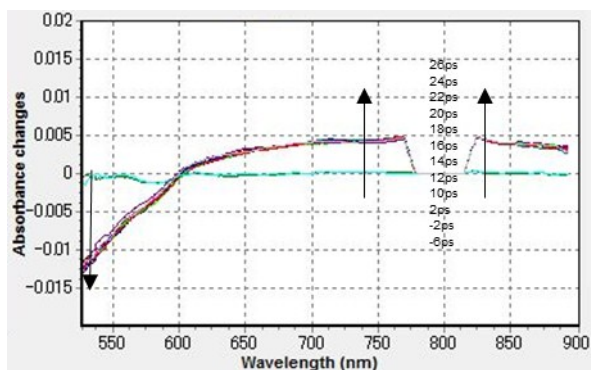

(b) Visible region (long-term)

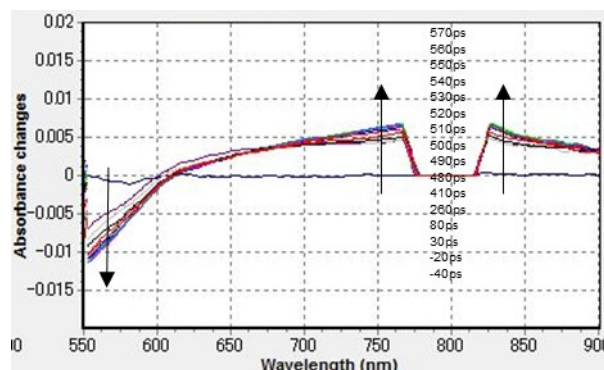

(c) NIR region (long-term)

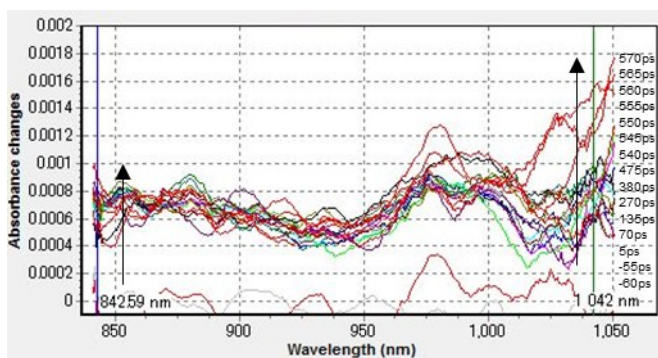

**Figure S6-2** Subpicosecond transient absorption spectra of N719 on  $\text{TiO}_2$  films ( $\sim 4 \mu\text{m}$  thick) in DSSCs under short-circuit condition in the visible (a) and (b), and the NIR region (c). Transient absorption spectra were measured on hermetically-sealed DSSCs with a pump-probe method. Pump laser pulses (wavelength: 492 nm) were generated with an OPA system (Light Conversion TOPAS-C) excited by an 800 nm subpicosecond laser pulses from an amplified Ti: sapphire laser system (a pulse width of 130 fs, and a repetition rate of 1.0 kHz, Spectra Physics Hurricane). Probe white light continuum pulses were generated by focusing the 800 nm laser pulses on a 3 mm thick sapphire crystal plate. The transmitted probe beams were dispersed using a monochromator ( $f = 250 \text{ mm}$ ) installed with a holographic grating (150 gr/mm,  $\lambda_{\text{blaze}} = 700 \text{ nm}$ ), and were detected with a 1024-pixel InGaAs CCD detector. The absorbance change,  $\Delta\alpha$ , is calculated by  $-\log[T_{\text{pump}}(\lambda)/T_{\text{w/o pump}}(\lambda)]$ , where  $T_{\text{pump}}(\lambda)$  and  $T_{\text{w/o pump}}(\lambda)$  are the transmitted probe beam signals obtained with pump beams and without pump beams, respectively. An instrument response function of the system is about 250 fs. The spectra (a)-(c) exhibit the time evolution of oxidized state of N719 after pulsed excitation. The absorption increase in the visible region (from 600 nm to 800 nm) is attributed to the absorption of oxidized ruthenium dye cation created by the photoinduced electron injection to  $\text{TiO}_2$ . The absorption increase in the NIR region ( $\sim 1000 \text{ nm}$ ) is assigned to the carrier absorption in  $\text{TiO}_2$  caused by photoinduced electron transfer from the dye. The dip appearing around 800 nm is artifact due to a signal saturation of the detector.

## S7 TiCl<sub>4</sub> Treatment for Improving DSSC Properties

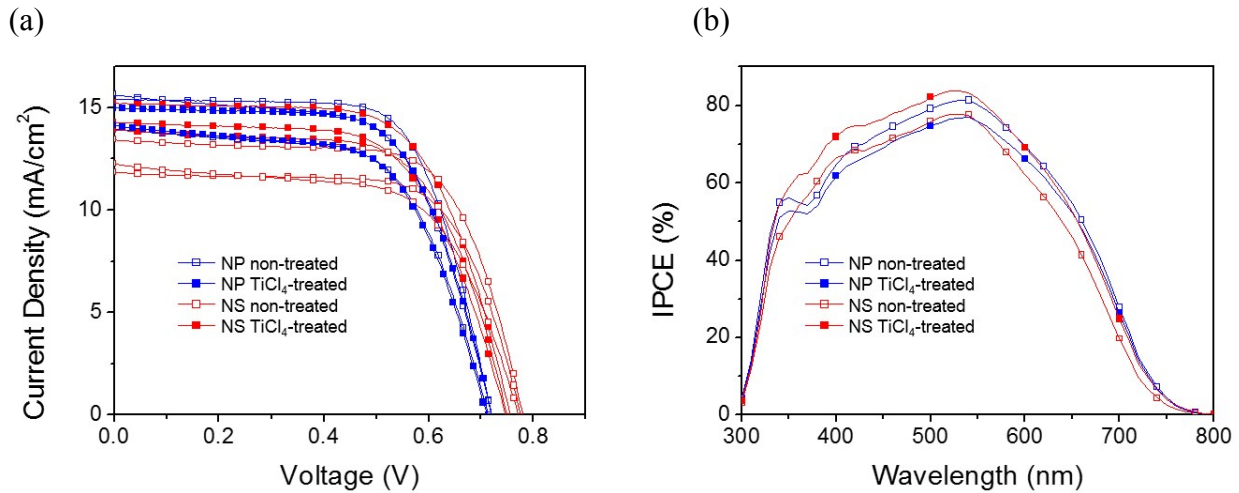

Fig S7-1. (a)  $J$ - $V$  and (b) IPCE characteristics of DSSCs with electrolyte of LiImtBP and TiO<sub>2</sub> film of NS (red) and NP (blue) with (fill) and without (open) TiCl<sub>4</sub> treatment. Thickness of TiO<sub>2</sub> films (~10 μm) with scattering layer (~5 μm) are prepared to be identical for both NS and NP achieving complete light harvesting efficiency of DSSC with revealing the device-to-device deviations.

Table S7-1. Photovoltaic properties of DSSC by using NS and NP with and without TiCl<sub>4</sub> treatment.

|                                | NP           |                           | NS           |                           |
|--------------------------------|--------------|---------------------------|--------------|---------------------------|
|                                | Non-treated  | TiCl <sub>4</sub> treated | Non-treated  | TiCl <sub>4</sub> treated |
| $J_{SC}$ (mA/cm <sup>2</sup> ) | 15.02 ± 0.92 | 15.07 ± 0.95              | 12.54 ± 0.83 | 14.48 ± 0.68              |
| $V_{OC}$ (mV)                  | 720.2 ± 5.5  | 718.6 ± 4.8               | 777.5 ± 2.8  | 752.5 ± 4.8               |
| $FF$ (%)                       | 64.5 ± 3.2   | 63.6 ± 1.9                | 66.4 ± 3.6   | 64.3 ± 1.2                |
| Conversion Efficiency (%)      | 6.98 ± 0.68  | 6.89 ± 0.60               | 6.48 ± 0.63  | 7.01 ± 0.43               |

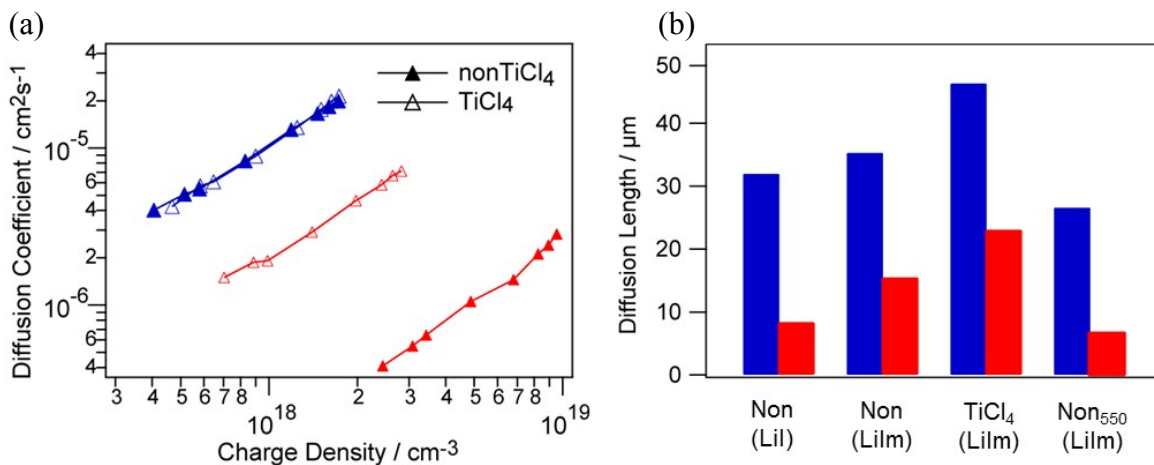

Fig S7-2. (a) Diffusion coefficients with electrolyte of LiIm and (b) diffusion length of electron with electrolyte of LiI and LiIm in DSSCs with TiO<sub>2</sub> films of NS (red) and NP (blue) with (open) and without (filled) TiCl<sub>4</sub> treatment with the films thickness of 4 μm. Non550 indicates TiO<sub>2</sub> annealed at 550°C.

## REFERENCES

- (1) Yang, H. G.; Sun, H. S.; Qiao, S. Z.; Zou, J.; Liu, G.; Smith, S. C.; Cheng, H. M.; Lu, G. Q. *Nature* **2008**, *453*, 638-641.
- (2) Han, X.; Kuang, Q.; Jin, M.; Xie, Z.; Zheng, L. *J. Am. Chem. Soc.* **2009**, *131*, 3152-3153.
- (3) Wang, X.; Liu, G.; Wang, L.; Pan, J.; Lu, G. Q.; Chen, H. M. *J. Mater. Chem.* **2011**, *21*, 869-873.
- (4) Maitani, M. M.; Tanaka, K.; Mochizuki, D.; Wada, Y. *J. Phys. Chem. Lett.* **2011**, *2*, 2655–2659.
- (5) Ito S., *Dye-sensitized Solar Cells*, (Eds: K. Kalyanasundaram), EPFL Press, Lausanne, 2010, Ch. 8.
- (6) Nakade, S.; Kanzaki, T.; Wada, Y.; Yanagida, S., *Langmuir*, **2005**, *21*, 10803-10807.
- (7) Duffy, N. W.; Peter, L. M.; Rajapakse, R. M. G.; Wijayantha, K. G. U., *Electrochem. Commun.*, **2000**, *2*, 658-662.
- (8) O'Regan, B. C.; Bakker, K.; Kroeze, J.; Smit, H.; Sommeling, P.; Durrant, J. R., *J. Phys. Chem. B* **2006**, *110*, 17155-17160.
- (9) Shen, Q.; Katayama, K.; Sawada, T.; Hachiya, S.; Toyoda S. *Chem. Phys. Lett.* **2012**, *542*, 89–93.
